# Supplementary material for: N-acetylation of α-synuclein enhances synaptic vesicle clustering mediated by α-synuclein and lysophosphatidylcholine
Source: eLife. 2024 Dec 27;13:RP97228. doi: 10.7554/eLife.97228 (PMC11677226; doi:10.7554/eLife.97228)
Supplement: Figure 1—source data 1. [file elife-97228-fig1-data1.xlsx]

## Sheet: Fig1c
	SV & Act-α-Syn				SV & un-α-Syn				SV only no α-Syn				Ploted data	SV & Act-α-Syn	SV & un-α-Syn	SV only no α-Syn
Repeat1	Item	Diameter (nm)	%Polydispersity	%Number	Item	Diameter (nm)	%Polydispersity	%Number	Item	Diameter (nm)	%Polydispersity	%Number	Single SV	68.5	85.5	100
	Peak 1	4.698	15.5	----	Peak 1	1.3	11.9	----	Peak 1	2.4	3.1	----		65.6	86.7	100
	Peak 2	50.852	30.2	68.5	Peak 2	50	25.7	85.5	Peak 2	64.7	34.9	100		74.5	86.3	92.8
	Peak 3	127.512	13.1	29.9	Peak 3	126.9	17.2	14.5	Peak 3	1472.5	21.9	0	Avg(%Number)	69.5333	86.1667	97.6
	Peak 4	221.087	6	1.6	Peak 4	2385.6	59.6	0					Std(%Number)	4.53909	0.61101	4.15692
													SV cluster	30.4667	13.8333	2.4
Repeat2	Item	Diameter (nm)	%Polydispersity	%Number	Item	Diameter (nm)	%Polydispersity	%Number	Item	Diameter (nm)	%Polydispersity	%Number
	Peak 1	1.817	15.5	----	Peak 1	4.4	18.4	----	Peak 1	5	7.6	----
	Peak 2	55.398	26.1	65.6	Peak 2	43.6	31.4	86.7	Peak 2	64.2	33.3	100
	Peak 3	129.99	18.2	34.4	Peak 3	125.5	13.5	13.3
	Peak 4	1669.12	26.1	0
Repeat3	Item	Diameter (nm)	%Polydispersity	%Number	Item	Diameter (nm)	%Polydispersity	%Number	Item	Diameter (nm)	%Polydispersity	%Number
	Peak 1	1.043	13.7	----	Peak 1	2.7	14.1	----	Peak 1	41.3	28.8	92.8
	Peak 2	55.455	26.1	74.5	Peak 2	48.4	28.9	86.3	Peak 2	126.7	16.3	7.2
	Peak 3	127.093	16.9	25.5	Peak 3	122.7	12.5	13.7

## Sheet: Fig1d
	SV & un-α-Syn				SV & Δ30-α-Syn				SV only no α-Syn				Ploted data	SV & un-α-Syn	SV & Δ30-α-Syn	SV only no α-Syn
Repeat1	Item	Diameter (nm)	%Polydispersity	%Number	Item	Diameter (nm)	%Polydispersity	%Number	Item	Diameter (nm)	%Polydispersity	%Number	Single SV	85.5	99.7	100
	Peak 1	1.3	11.9	----	Peak 1	1.5	6.4	----	Peak 1	2.4	3.1	----		86.7	93.3	100
	Peak 2	50	25.7	85.5	Peak 2	59.9	42.2	99.7	Peak 2	64.7	34.9	100		86.3	90.9	92.8
	Peak 3	126.9	17.2	14.5	Peak 3	409.2	19.8	0.3	Peak 3	1472.5	21.9	0	Avg(%Number)	86.1667	94.6333	97.6
	Peak 4	2385.6	59.6	0									Std(%Number)	0.61101	4.54899	4.15692
													SV cluster	13.8333	5.36667	2.4
Repeat2	Item	Diameter (nm)	%Polydispersity	%Number	Item	Diameter (nm)	%Polydispersity	%Number	Item	Diameter (nm)	%Polydispersity	%Number
	Peak 1	4.4	18.4	----	Peak 1	2	10.1	----	Peak 1	5	7.6	----
	Peak 2	43.6	31.4	86.7	Peak 2	53.4	35.3	93.3	Peak 2	64.2	33.3	100
	Peak 3	125.5	13.5	13.3	Peak 3	136.6	4.6	6.7
					Peak 4	1541	24	0
Repeat3	Item	Diameter (nm)	%Polydispersity	%Number	Item	Diameter (nm)	%Polydispersity	%Number	Item	Diameter (nm)	%Polydispersity	%Number
	Peak 1	2.7	14.1	----	Peak 1	1.3	15.1	----	Peak 1	41.3	28.8	92.8
	Peak 2	48.4	28.9	86.3	Peak 2	42.6	29.7	90.9	Peak 2	126.7	16.3	7.2
	Peak 3	122.7	12.5	13.7	Peak 3	126.2	15.8	9.1
					Peak 4	2000.4	41.4	0
